# Supplementary material
Source: PubMed Central journal article supplement (PMC1876381)
Supplement: bj4030519add.pdf [file bj4030519add.pdf]

Supplemental Data for BJ-Zhao manuscript

Supplemental Table.

**Temporal changes of gene expression in primary adipocyte**

|              | <b>Adiponectin</b> | <b>Leptin</b> | <b>ALBP</b> | <b>LPL</b> | <b>HSL</b> |
|--------------|--------------------|---------------|-------------|------------|------------|
| <b>0 hr</b>  | 100                | 100           | 100         | 100        | 100        |
| <b>4 hr</b>  | 181±20             | 122±20        | 101±10      | 93±10      | 78±5       |
| <b>8 hr</b>  | 175±21             | 85±12         | 82±1        | 73±5       | 54±10      |
| <b>12 hr</b> | 103±8              | 95±10         | 100±13      | 105±6      | 44±4*      |
| <b>16 hr</b> | 210±10*            | 102±15        | 174±13      | 135±2      | 52±3*      |
| <b>24 hr</b> | 74±12              | 52±12*        | 72±20       | 71±1       | 25±3*      |

Rat primary white adipocytes were incubated in the DMEM medium containing 3% BSA for 4, 8, 12, 16 and 24 hrs. The expression levels of adiponectin, leptin, ALBP, LPL, and HSL were measured using real-time PCR (Taqman) (see Methods). The results reflect two independent experiments, with each sample of each experiment analyzed three times with 4, 8, and 16 ng of template. The symbol “\*” indicates a statistical difference at  $P < 0.05$  between indicated groups and the 0 hr controls.
